# Supplementary material
Source: Research Square preprint supplement (doi:10.21203/rs.3.rs-9341064/v1)
Supplement: Supplementary file 1 [file bfc169ce476436dacf46127b.docx]

Table 1: Summary of financial (F) and economic (E) cost items included in national costing of influenza vaccination program in Kenya

| **Cost item per category** | **Type of cost** | | **Description of costs item** |
| --- | --- | --- | --- |
| F | E |
| 1. **Training and microplanning*** |  |  |  |
| Personnel time |  | ✓ | Staff time of existing staff |
| Allowances | ✓ | ✓ | Per diems to attend out of town meetings for national level staff |
| Meetings | ✓ | ✓ | Costs associated with meetings for development of training material, sensitization of county staff, training of county healthcare workers and microplanning. Costs include travel reimbursements, per diems, stationery and venue costs |
|  |  |  |  |
| 1. **Cold chain expansion** |  |  |  |
| Purchase of walk in cold room (WICR) and refrigerators |  |  | Annualized cost of purchase of WICRs at the regional level and purchase of refrigerators at the health facility level |
|  |  |  |  |
| 1. **Distribution** |  |  |  |
| Personnel time |  | ✓ | Staff time of existing staff |
| Allowances | ✓ | ✓ | Allowances of casual laborers to support loading and offloading of vaccines |
| Mileage |  | ✓ | Mileage costs of using existing vehicles to transport vaccine |
| Fuel | ✓ | ✓ | Fuel costs for using existing vehicles to transport vaccine |
| Building storage |  | ✓ | Storage space within buildings used to store vaccines |
|  |  |  |  |
| 1. **Supervision** |  |  |  |
| Personnel time |  | ✓ | Staff time of existing staff |
| Allowances | ✓ | ✓ | Per diems to attend out of town meetings for national level staff |
| Meeting costs | ✓ | ✓ | Costs associated with meetings for feedback of supervision exercise. Costs include travel reimbursements, per diems, stationery and venue costs |
|  |  |  |  |
| 1. **Social mobilization** |  |  |  |
| Personnel time (inclusive of community health promoters **) |  | ✓ | Staff time of existing staff |
| Design and production of information education and communication (IEC) material | ✓ | ✓ | Vendor costs to design and produce IEC material and pre-testing of the material |
| Production and airing of TV and radio ads** | ✓ | ✓ | Vendor costs to produce and air ads on television and radio |
| Meetings | ✓ | ✓ | Costs associated with meetings to sensitize community stakeholders at the county and sub county level and sensitize and mobilize community health promoters. Costs include travel reimbursements, per diems, stationery and venue costs |
| Launch of campaign (specific to campaign strategy) | ✓ | ✓ | Costs associated with launch of the campaign strategy. Costs include public address system, seat and tent hire, water. |
|  |  |  |  |
| 1. **Service delivery** |  |  |  |
| Personnel time |  | ✓ | Staff time of existing staff |
| Additional staff hires (for campaign strategy only) | ✓ | ✓ | Additional short-term staff hire to support the extra workload associated with the campaign strategy |
| Overhead costs at health facilities |  | ✓ | Water and electricity costs at the health facility |
|  |  |  |  |
| 1. **Procurement** |  |  |  |
| Purchase of vaccines, syringes and safety boxes. | ✓ | ✓ | Procurement of vaccines, syringes and safety boxes |
|  |  |  |  |
| 1. **Other** |  |  |  |
| Small cold chain equipment capital costs | ✓ | ✓ | Annualized capital costs of purchasing new small cold chain equipment such as fridge tags, vaccine carriers, cold boxes etc. |
| Vehicle capital costs for vehicles used in transport of vaccines |  | ✓ | Annualized capital cost of using existing vehicles used in transport of vaccines |
| Use of existing cold chain capacity and storage areas |  | ✓ | Annualized capital cost of using existing cold chain capacity and buildings to store vaccines |
| Waste disposal |  | ✓ | Costs of burning chamber at health facility |

* Although the WHO flu tool separates training and microplanning costs, we combined them in our analysis because these activities were conducted jointly during the influenza vaccine demonstration project in Kenya. **These costs were not obtained from the 2019-2021 demonstration project which was limited to 4 sub counties but were included in this extrapolation of national costs.

Table 2: Key inputs in the costing exercise

| **Item** | **Campaign strategy** | **Campaign-to-year-round strategy** | **Year-round strategy** | **Source** |
| --- | --- | --- | --- | --- |
| **Eligible population** | 2021: 2,401,180 | 2021: 3,577,046 | | Calculated |
| 2022: 2,751,136 | 2022: 3,949,343 | |
| 2023: 2,657,860 | 2023: 3,225,575 | |
| 2024: 2,708,767 | 2024: 3,288,489 | |
| 2025: 2,762,276 | 2025: 3,354,258 | |
|  |  | | |  |
| **Prices** | The price of vaccine is $4.40 per dose for a 10 dose multi-dose vial; auto-disable (AD) syringe is $0.03 per unit; and safety box is $1.61 per unit | | | (13,25) |
|  |  | | |  |
| **Vaccine wastage rate** | 20% | | | (19) |
|  |  | | |  |
| **Safety box** | Quantities estimated at 1 safety box per 100 AD syringes | | | (19) |
|  |  | | |  |
| **Inflation** | 2021 inflation rate: 6.10% | | | (16) |
| 2022 inflation rate: 7.60% | | |
| 2023 inflation rate: 7.70% | | |
| 2024 inflation rate: 4.70% | | |
| 2025 inflation rate: 6.50% | | | Average of 2021 to 2024 |
|  |  | | |  |
| **Annual discount rate** | 7% | | | (4) |
|  |  | | |  |
| **Exchange rate (USD to KES)** | 2025: 129.0 KES | | | (15) |
| 2021: 109.7 KES | | |

Table 3: Key assumptions in each of the proposed strategies for a national influenza vaccine program in Kenya targeting children 6-23 months of age.

| **Category** | **Assumptions** | | |
| --- | --- | --- | --- |
| **Campaign strategy** | **Year-round strategy** | **Campaign-to-year-round strategy** |
| **Training and microplanning** | In Years 2 to 5 following introduction of the influenza vaccine, annual training and microplanning costs are a quarter of the costs incurred in Year 1 (introductory year) | In Years 2 to 5 following introduction of the influenza vaccine, annual training and microplanning costs are no longer incurred as a financial cost specific to influenza vaccine but are incurred as an economic cost at 10% of Year 1 (introductory year) costs | Costs are equal to the campaign strategy in Year 1 and the year-round strategy in years 2 to 5. |
| **Cold chain expansion** | Only a portion of the cost of new walk in cold rooms (WICR) and refrigerators are allocated to the influenza vaccination program. There is currently insufficient capacity to meet the cold chain capacity needs of the routine immunization program and supplementary immunization activities for the existing vaccines. As such, a portion of the purchase cost of cold chain expansion is allocated to these other vaccines as well as influenza vaccine. At the national and regional level this is apportioned as the total capacity of WICR that influenza vaccine will occupy and at the health facility level this is estimated to be a third of the cost of all new refrigerators. Compared to higher levels in the distribution system, the cold chain capacity required for influenza vaccine at health facility level is relatively small due to the need to stock only one month’s supply for a much smaller population compared to the regional or national stores. In addition, older vaccines in the program are stored within existing refrigerators and any deficit in cold chain capacity is due to more recent additions to the national immunization program. As such the cost attributed to influenza vaccine for purchase of refrigerators at the health facility level was estimated to be a third of the cost of the new refrigerators rather than a cost equivalent to the portion of space the influenza vaccine would occupy in the refrigerator. At the health facility level, electric powered and solar powered refrigerators were purchased at a ratio of 2:1. | | |
| **Distribution** | Distribution of vaccine involves trips where the influenza vaccine is transported on its own without any other vaccines and this constitutes a financial and economic cost.   - Transport of vaccines from national to regional stores takes place twice a year solely for influenza and once a year in combination with other vaccines. - Transport of influenza vaccine from regional to sub county stores takes place twice a year solely for influenza and once a year in combination with other vaccines. | Distribution of vaccine always occurs alongside other vaccines and is captured as an economic cost. Influenza vaccine program takes up 10% of the cost of the following distribution costs:   - National store to regional stores -twice a year - Regional to sub-county stores - four times a year - Sub-county stores to health facilities – once a month | In the introductory year costs are equal to the campaign strategy for the introductory months and then the year-round strategy for the remaining 8 months in the year. In subsequent years, costs are equal to the year-round costs for the corresponding year. |
| **Supervision** | In Years 2 to 5 following introduction of the influenza vaccine, annual supervision costs are a quarter of the costs incurred in Year 1. | In Years 2 to 5 following introduction of the influenza vaccine, annual supervision costs specifically for influenza vaccine are no longer incurred as a financial cost but are incurred at 10% of the Year 1 costs as an economic cost | Costs are equal to the campaign strategy in Year 1 and the year-round strategy in years 2 to 5. |
| **Social mobilization** | In Years 2 to 5 following introduction of the influenza vaccine, annual social mobilization costs are a quarter of the costs incurred in Year 1 | In Years 2 to 5 following introduction of the influenza vaccine, annual social mobilization costs are no longer incurred specifically for influenza vaccine and are incurred at 10% of the Year 1 costs as an economic cost. | Costs are equal to the campaign strategy in Year 1 and the year-round strategy in years 2 to 5. |
| **Service delivery** | Financial costs are incurred from hiring additional nurses to support the extra workload during a campaign. | No financial costs are incurred in hiring additional staff during the year. | In the introductory year, costs are equal to the campaign strategy in the first 4 months and 33% of the year-round costs which is equivalent to the proportion of children in the target population that are to be vaccinated in the remainder of the year. In subsequent years, costs are equal to the year-round costs for the corresponding year. |
| **Procurement of vaccine, syringes and safety boxes** | We assume 60% coverage of the influenza vaccine in the introductory year and 80% coverage in of the target population in subsequent years. | | |

| *Table 4: Financial and economic costs influenza vaccination strategies among children 6-23 months of age in Kenya during the introductory years (2021) and post-introduction years (average of 2022-2025 costs)* | | | | | | | | | | |  | |  | |  | |  | |  | |
| --- | --- | --- | --- | --- | --- | --- | --- | --- | --- | --- | --- | --- | --- | --- | --- | --- | --- | --- | --- | --- |
|  | **Campaign-to-year-round strategy** | | | |  | **Year-round strategy** | | | | |  | | **Campaign strategy** | | | | | | | |
| **Cost category** | **Introductory year cost (2021)** | | **Average cost for post-introduction years (2022-2025)** | |  | **Introductory year cost (2021)** | | **Average cost for post-introduction years (2022-2025)** | |  | | **Introductory year cost (2021)** | | | | **Average cost for post-introduction years (2022-2025)** | | | | |
| **USD Amount** | **%** | **USD Amount** | **%** |  | **USD Amount** | **%** | **USD Amount** | **%** |  | | **USD Amount** | | **%** | | **USD Amount** | | **%** | |
| **a.        Financial costs** |  |  |  |  |  |  |  |  |  |  | |  | |  | |  | |  | |
| Training and microplanning | 1,926,195 | 6.7% | - | 0.0% |  | 1,798,410 | 7.21% | - | 0.0% |  | | 1,926,195 | | 9.0% | | 593,128 | | 3.0% | |
| Cold chain expansion | 295,773 | 1.0% | 295,773 | 1.6% |  | 295,553 | 1.2% | 295,553 | 1.6% |  | | 295,773 | | 1.4% | | 295,773 | | 1.5% | |
| Distribution | 14,534 | 0.1% | 2,117 | 0.0% |  | 2,024 | 0.0% | 2,117 | 0.0% |  | | 13,184 | | 0.1% | | 13,764 | | 0.1% | |
| Supervision | 1,836,124 | 6.4% | - | 0.0% |  | 1,058,968 | 4.2% | - | 0.0% |  | | 1,130,145 | | 5.3% | | 413,883 | | 2.1% | |
| Social mobilization | 3,095,579 | 10.8% | - | 0.0% |  | 1,785,203 | 7.16% | - | 0.0% |  | | 3,095,579 | | 14.4% | | 881,215 | | 4.5% | |
| Service delivery | 1,538,372 | 5.4% | - | 0.0% |  | - | 0.0% | - | 0.0% |  | | 1,538,372 | | 7.2% | | 1,538,372 | | 7.8% | |
| Other | 10,031 | 0.0% | 10,031 | 0.1% |  | 10,031 | 0.0% | 10,031 | 0.1% |  | | 10,031 | | 0.0% | | 10,031 | | 0.1% | |
| Procurement* | 19,998,525 | 69.6% | 17,754,652 | 98.3% |  | 19,998,525 | 80.2% | 17,754,652 | 98.3% |  | | 13,424,499 | | 62.6% | | 15,884,971 | | 80.9% | |
| Total with procurement costs | 28,715,134 | 100.0% | 18,062,572 | 100.0% |  | 24,948,714 | 100.0% | 18,062,352 | 100.0% |  | | 21,433,779 | | 100.0% | | 19,631,137 | | 100.0% | |
| Total without procurement costs | 8,716,608 | 30.4% | 307,921 | 1.7% |  | 4,950,189 | 19.8% | 307,701 | 1.7% |  | | 8,009,280 | | 37.4% | | 3,746,167 | | 19.1% | |
|  |  |  |  |  |  |  |  |  |  |  | |  | |  | |  | |  | |
| Cost per dose administered with procurement costs | 7.65 | 100.0% | 5.42 | 100.0% |  | 6.64 | 100.0% | 5.42 | 100.0% |  | | 8.50 | | 100.0% | | 6.58 | | 100.0% | |
| Cost per dose administered without procurement costs | 2.32 | 30.4% | 0.09 | 1.7% |  | 1.32 | 19.8% | 0.09 | 1.7% |  | | 3.18 | | 37.4% | | 1.26 | | 19.1% | |
|  |  |  |  |  |  |  |  |  |  |  | |  | |  | |  | |  | |
| **b.        Economic costs** |  |  |  |  |  |  |  |  |  |  | |  | |  | |  | |  | |
| Training and microplanning | 3,859,335 | 8.6% | 386,592 | 1.1% |  | 3,627,770 | 8.4% | 386,592 | 1.1% |  | | 3,859,335 | | 12.6% | | 1,076,448 | | 4.1% | |
| Cold chain expansion | 421,308 | 0.9% | 421,308 | 1.2% |  | 420,945 | 1.0% | 420,945 | 1.2% |  | | 421,308 | | 1.4% | | 421,308 | | 1.6% | |
| Distribution | 2,877,974 | 6.4% | 3,290,780 | 9.5% |  | 2,802,932 | 6.5% | 3,290,780 | 9.5% |  | | 775,775 | | 2.5% | | 816,552 | | 3.1% | |
| Supervision | 2,903,291 | 6.5% | 189,372 | 0.5% |  | 1,792,628 | 4.1% | 189,372 | 0.5% |  | | 1,708,206 | | 5.6% | | 625,114 | | 2.4% | |
| Social mobilization | 4,267,737 | 9.5% | 630,564 | 1.8% |  | 3,445,729 | 7.9% | 375,609 | 1.1% |  | | 4,267,737 | | 14.0% | | 1,296,348 | | 4.9% | |
| Service delivery | 8,291,694 | 18.5% | 9,401,231 | 27.0% |  | 8,976,645 | 20.7% | 9,401,231 | 27.2% |  | | 5,341,070 | | 17.5% | | 5,410,126 | | 20.5% | |
| Other | 2,278,246 | 5.1% | 2,697,911 | 7.8% |  | 2,278,246 | 5.3% | 2,697,911 | 7.8% |  | | 753,592 | | 2.5% | | 890,279 | | 3.4% | |
| Procurement* | 19,998,525 | 44.5% | 17,754,652 | 51.1% |  | 19,998,525 | 46.1% | 17,754,652 | 51.4% |  | | 13,424,499 | | 43.9% | | 15,884,971 | | 60.1% | |
| Total with procurement costs | 44,898,111 | 100.0% | 34,772,409 | 100.0% |  | 43,343,421 | 100.0% | 34,517,091 | 100.0% |  | | 30,551,522 | | 100.0% | | 26,421,145 | | 100.0% | |
| Total without procurement costs | 24,899,585 | 55.5% | 17,017,758 | 48.9% |  | 23,344,895 | 53.9% | 16,762,439 | 48.6% |  | | 17,127,024 | | 56.1% | | 10,536,174 | | 39.9% | |
|  |  |  |  |  |  |  |  |  |  |  | |  | |  | |  | |  | |
| Cost per dose administered with procurement costs | 11.95 | 100.0% | 10.43 | 100.0% |  | 11.54 | 100.0% | 10.35 | 100.0% |  | | 12.12 | | 100.0% | | 8.86 | | 100.0% | |
| Cost per dose administered without procurement costs | 6.63 | 55.5% | 5.10 | 48.9% |  | 6.22 | 53.9% | 5.03 | 48.6% |  | | 6.79 | | 56.1% | | 3.54 | | 39.9% | |

*Refers to procurement of vaccines, safety boxes and AD syringes
