# Supplementary material
Source: Research Square preprint supplement (doi:10.21203/rs.3.rs-9341064/v1)
Supplement: Supplementary file 2 [file c4a27d654bcecb3a7de74849.docx]

Supplementary Table 1: Description of annual number of eligible children in target population for each strategy receiving 2 doses or 1 dose of influenza vaccine each year

| **Year** |  | | **Doses to be administered per child** | **Campaign strategy** | | | **Year-round strategy and campaign to year-round strategy** | | |
| --- | --- | --- | --- | --- | --- | --- | --- | --- | --- |
|  | | **Description of eligible population** | **No. of children** | **Sub total** | **Description of eligible population** | **No. of children** | **Sub total** |
| **Year 1 (2021)** |  | | 2 | Children aged 6 -23 months at the start of the year | 2,009,224 | 2,401,180 | Children aged 6 -23 months at the start of the year | 2,009,224 | 3,577,046 |
|  | | Children turning 6 months of age over the next 3 months* of the campaign | 391,956 | Children turning 6 months of age over the next 12 months | 1,567,822 |
|  | | 1 | None |  |  | None |  |  |
|  | | **Annual number of children to be vaccinated** | | **2,401,180** | | **Annual number of children to be vaccinated** | **3,577,046** | |
|  |  | |  |  |  |  |  |  |  |
| **Year 2 (2022)** |  | | 2 | Children turning 6 months of age over the next 3 months* of the campaign | 399,403 | 1,575,269 | Children turning 6 months of age over the next 12 months | 1,597,610 | 1,597,610 |
|  | | Children who turned 6 months of age in the 9 months preceding the start of the current year (i.e. children aged 7-15 months at the start of the year) | 1,175,867 |  |  |  |
|  | | 1 | Children 6-11 months at the start of year 1 (i.e. children aged 18-23 months at the start of the current year) | 783,911 | 1,175,867 | Children 6-11 months at the start of year 1 (children aged 18-23 months at the start of the current year) | 783,911 | 2,351,733 |
|  | | Children who turned 6 months of age in the first 3 months of the preceding year | 391,956 | Children turning 6 months of age during the preceding year | 1,567,822 |  |
|  | | **Annual number of children to be vaccinated** | | **2,751,136** | | **Annual number of children to be vaccinated** | **3,949,343** | |
|  |  | |  |  |  |  |  |  |  |
| **Year 3 (2023)** |  | | 2 | Children turning 6 months of age over the next 3 months* of the campaign | 406,991 | 1,605,199 | Children turning 6 months of age over the next 12 months | 1,627,965 | 1,627,965 |
|  | | Children who turned 6 months of age in the 9 months preceding the start of the current year (i.e. children aged 7-15 months at the start of the year) | 1,198,208 |  |  |  |
|  | | 1 | Children who turned 6 months of age in the first 3 months of the preceding year | 399,403 | 1,052,662 | Children turning 6 months of age during the preceding year | 1,597,610 | 1,597,610 |
|  | | Children who turned 6 months of age in the last 5 months of Year 1 | 653,259 |  |  |  |
|  | | **Annual number of children to be vaccinated** | | **2,657,860** | | **Annual number of children to be vaccinated** | **3,225,575** | |
|  |  | |  |  |  |  |  |  |  |
| **Year 4 (2024)** |  | | 2 | Children turning 6 months of age over the next 3 months* of the campaign | 415,131 | 1,636,105 | Children turning 6 months of age over the next 12 months | 1,660,524 | 1,660,524 |
|  | | Children who turned 6 months of age in the 9 months preceding the start of the current year (children aged 7-15 months at the start of the year) | 1,220,974 |  |  |  |
|  | | 1 | Children who turned 6 months of age in the first 3 months of the preceding year | 406,991 | 1,072,662 | Children turning 6 months of age during the preceding year | 1,627,965 | 1,627,965 |
|  | | Children who turned 6 months of age in the last 5 months of Year 2 | 665,671 |  |  |  |
|  | | **Annual number of children to be vaccinated** | | **2,708,767** | | **Annual number of children to be vaccinated** | **3,288,489** | |
|  |  | |  |  |  |  |  |  |  |
| **Year 5 (2025)** |  | | 2 | Children turning 6 months of age over the next 3 months* of the campaign | 423,434 | 1,668,827 | Children turning 6 months of age over the next 12 months | 1,693,734 | 1,693,734 |
|  | | Children who turned 6 months of age in the 9 months preceding the start of the current year (children aged 7-15 months at the start of the year) | 1,245,393 |  |  |  |
|  | | 1 | Children who turned 6 months of age in the first 3 months of the preceding year | 415,131 | 1,093,450 | Children turning 6 months of age during the preceding year | 1,660,524 | 1,660,524 |
|  | | Children who turned 6 months of age in the last 5 months of Year 3 | 678,319 |  |  |  |
|  | | **Annual number of children to be vaccinated** | | **2,762,276** | | **Annual number of children to be vaccinated** | **3,354,258** | |
|  |  | |  |  |  |  |  |  |  |
|  | | **Total number of eligible children in target age group (2021 to 2025)** | | | **13,281,219** | | **Total number of eligible children in target age group (2021 to 2025)** | **17,394,711** | |

* For the campaign strategy, although the influenza vaccine was available for 4 months, children receiving influenza vaccine for the first time, could only receive the first dose of influenza vaccine in the first 3 months of the campaign allowing for the second dose to be received in the fourth month of the campaign.

| *Supplementary table 2: Financial and economic costs of a campaign-to-year-round influenza vaccination strategy among children 6-23 months of age during the first five years of implementation in Kenya* | | | | | | | | | | | | | | | | | | | | | | | | | | | | | | | | | |  | | | | | |  | | | | | |
| --- | --- | --- | --- | --- | --- | --- | --- | --- | --- | --- | --- | --- | --- | --- | --- | --- | --- | --- | --- | --- | --- | --- | --- | --- | --- | --- | --- | --- | --- | --- | --- | --- | --- | --- | --- | --- | --- | --- | --- | --- | --- | --- | --- | --- | --- |
| **Cost category** | **2021** | |  | | | | | **2022** | | | | |  | | | | **2023** | | | | |  | | | | **2024** | | | | |  | | | **2025** | | | | | |  | | | | | |
|  | **USD Amount** | | **%** | | | | | **USD Amount** | | | | | **%** | | | | **USD Amount** | | | | | **%** | | | | **USD Amount** | | | | | **%** | | | **USD Amount** | | | | | | **%** | | | | | |
| **a.        Financial costs** |  | |  | | | | |  | | | | |  | | | |  | | | | |  | | | |  | | | | |  | | |  | | | | | |  | | | | | |
| Training and microplanning | 1,926,195 | | 6.7% | | | | | - | | | | | 0.0% | | | | - | | | | | 0.0% | | | | - | | | | | 0.0% | | | - | | | | | | 0.0% | | | | | |
| Cold chain expansion | 295,773 | | 1.0% | | | | | 295,773 | | | | | 1.7% | | | | 295,773 | | | | | 1.6% | | | | 295,773 | | | | | 1.6% | | | 295,773 | | | | | | 1.6% | | | | | |
| Distribution | 14,534 | | 0.1% | | | | | 2,062 | | | | | 0.0% | | | | 2,104 | | | | | 0.0% | | | | 2,131 | | | | | 0.0% | | | 2,171 | | | | | | 0.0% | | | | | |
| Supervision | 1,836,124 | | 6.4% | | | | | - | | | | | 0.0% | | | | - | | | | | 0.0% | | | | - | | | | | 0.0% | | | - | | | | | | 0.0% | | | | | |
| Social mobilization | 3,095,579 | | 10.8% | | | | | - | | | | | 0.0% | | | | - | | | | | 0.0% | | | | - | | | | | 0.0% | | | - | | | | | | 0.0% | | | | | |
| Service delivery | 1,538,372 | | 5.4% | | | | | - | | | | | 0.0% | | | | - | | | | | 0.0% | | | | - | | | | | 0.0% | | | - | | | | | | 0.0% | | | | | |
| Other | 10,031 | | 0.0% | | | | | 10,031 | | | | | 0.1% | | | | 10,031 | | | | | 0.1% | | | | 10,031 | | | | | 0.1% | | | 10,031 | | | | | | 0.1% | | | | | |
| Procurement* | 19,998,525 | | 69.6% | | | | | 17,037,201 | | | | | 98.2% | | | | 17,641,627 | | | | | 98.3% | | | | 17,989,992 | | | | | 98.3% | | | 18,349,787 | | | | | | 98.3% | | | | | |
| Total with procurement costs | 28,715,134 | | 100.0% | | | | | 17,345,067 | | | | | 100.0% | | | | 17,949,534 | | | | | 100.0% | | | | 18,297,927 | | | | | 100.0% | | | 18,657,762 | | | | | | 100.0% | | | | | |
| Total without procurement costs | 8,716,608 | | 30.4% | | | | | 307,866 | | | | | 1.8% | | | | 307,908 | | | | | 1.7% | | | | 307,935 | | | | | 1.7% | | | 307,975 | | | | | | 1.7% | | | | | |
|  |  | |  | | | | |  | | | | |  | | | |  | | | | |  | | | |  | | | | |  | | |  | | | | | |  | | | | | |
| Cost per dose administered with procurement costs | 7.65 | | 100.0% | | | | | 5.42 | | | | | 100.0% | | | | 5.42 | | | | | 100.0% | | | | 5.42 | | | | | 100.0% | | | 5.41 | | | | | | 100.0% | | | | | |
| Cost per dose administered without procurement costs | 2.32 | | 30.4% | | | | | 0.10 | | | | | 1.8% | | | | 0.09 | | | | | 1.7% | | | | 0.09 | | | | | 1.7% | | | 0.09 | | | | | | 1.7% | | | | | |
|  |  | |  | | | | |  | | | | |  | | | |  | | | | |  | | | |  | | | | |  | | |  | | | | | |  | | | | | |
| **b.        Economic costs** |  | |  | | | | |  | | | | |  | | | |  | | | | |  | | | |  | | | | |  | | |  | | | | | |  | | | | | |
| Training and microplanning | 3,859,335 | | 8.6% | | | | | 372,556 | | | | | 1.1% | | | | 383,216 | | | | | 1.1% | | | | 390,225 | | | | | 1.1% | | | 400,372 | | | | | | 1.1% | | | | | |
| Cold chain expansion | 421,308 | | 0.9% | | | | | 421,308 | | | | | 1.3% | | | | 421,308 | | | | | 1.2% | | | | 421,308 | | | | | 1.2% | | | 421,308 | | | | | | 1.2% | | | | | |
| Distribution | 2,877,974 | | 6.4% | | | | | 3,003,250 | | | | | 9.0% | | | | 3,221,627 | | | | | 9.4% | | | | 3,365,186 | | | | | 9.6% | | | 3,573,057 | | | | | | 9.9% | | | | | |
| Supervision | 2,903,291 | | 6.5% | | | | | 183,414 | | | | | 0.6% | | | | 187,939 | | | | | 0.5% | | | | 190,914 | | | | | 0.5% | | | 195,221 | | | | | | 0.5% | | | | | |
| Social mobilization | 4,267,737 | | 9.5% | | | | | 588,803 | | | | | 1.8% | | | | 620,521 | | | | | 1.8% | | | | 641,371 | | | | | 1.8% | | | 671,562 | | | | | | 1.9% | | | | | |
| Service delivery | 8,291,694 | | 18.5% | | | | | 9,150,986 | | | | | 27.6% | | | | 9,341,045 | | | | | 27.1% | | | | 9,465,988 | | | | | 26.9% | | | 9,646,903 | | | | | | 26.6% | | | | | |
| Other | 2,278,246 | | 5.1% | | | | | 2,450,566 | | | | | 7.4% | | | | 2,638,423 | | | | | 7.7% | | | | 2,761,918 | | | | | 7.8% | | | 2,940,736 | | | | | | 8.1% | | | | | |
| Procurement* | 19,998,525 | | 44.5% | | | | | 17,037,201 | | | | | 51.3% | | | | 17,641,627 | | | | | 51.2% | | | | 17,989,992 | | | | | 51.1% | | | 18,349,787 | | | | | | 50.7% | | | | | |
| Total with procurement costs | 44,898,111 | | 100.0% | | | | | 33,208,084 | | | | | 100.0% | | | | 34,455,706 | | | | | 100.0% | | | | 35,226,901 | | | | | 100.0% | | | 36,198,946 | | | | | | 100.0% | | | | | |
| Total without procurement costs | 24,899,585 | | 55.5% | | | | | 16,170,883 | | | | | 48.7% | | | | 16,814,079 | | | | | 48.8% | | | | 17,236,909 | | | | | 48.9% | | | 17,849,159 | | | | | | 49.3% | | | | | |
|  |  | |  | | | | |  | | | | |  | | | |  | | | | |  | | | |  | | | | |  | | |  | | | | | |  | | | | | |
| Cost per dose administered with procurement costs | 11.95 | | 100.0% | | | | | 10.38 | | | | | 100.0% | | | | 10.40 | | | | | 100.0% | | | | 10.43 | | | | | 100.0% | | | 10.50 | | | | | | 100.0% | | | | | |
| Cost per dose administered without procurement costs | 6.63 | | 55.5% | | | | | 5.05 | | | | | 48.7% | | | | 5.07 | | | | | 48.8% | | | | 5.10 | | | | | 48.9% | | | 5.18 | | | | | | 49.3% | | | | | |
| *Refers to procurement of influenza vaccines, safety boxes and AD syringes | | |  | | | | |  | | | | |  | | | |  | | | | |  | | | |  | | | | |  | | |  | | | | | |  | | | | | |
| *Supplementary table 3: Financial and economic costs of a year-round influenza vaccination strategy among children 6-23 months of age during the first five years of implementation in Kenya* | | | | | | | | | | | | | | | | | | | | | | | | | | | | | | | | | | | |  | |  | | | | |  |  | | | |  | |  | |
| **Cost category** | | **2021** | |  | | | | | **2022** | | | | |  | | | | | **2023** | | | | |  | | | | | **2024** | | | |  | | | | **2025** | | | | |  | | | | | | | |  | |
|  | | **USD Amount** | | **%** | | | | | **USD Amount** | | | | | **%** | | | | | **USD Amount** | | | | | **%** | | | | | **USD Amount** | | | | **%** | | | | **USD Amount** | | | | | **%** | | | | | | | |  | |
| **a.        Financial costs** | |  | |  | | | | |  | | | | |  | | | | |  | | | | |  | | | | |  | | | |  | | | |  | | | | |  | | | | | | | |  | |
| Training and microplanning | | 1,798,410 | | 7.21% | | | | | - | | | | | 0.0% | | | | | - | | | | | 0.0% | | | | | - | | | | 0.0% | | | | - | | | | | 0.0% | | | | | | | |  | |
| Cold chain expansion | | 295,553 | | 1.2% | | | | | 295,553 | | | | | 1.7% | | | | | 295,553 | | | | | 1.6% | | | | | 295,553 | | | | 1.6% | | | | 295,553 | | | | | 1.6% | | | | | | | |  | |
| Distribution | | 2,024 | | 0.0% | | | | | 2,062 | | | | | 0.0% | | | | | 2,104 | | | | | 0.0% | | | | | 2,131 | | | | 0.0% | | | | 2,171 | | | | | 0.0% | | | | | | | |  | |
| Supervision | | 1,058,968 | | 4.2% | | | | | - | | | | | 0.0% | | | | | - | | | | | 0.0% | | | | | - | | | | 0.0% | | | | - | | | | | 0.0% | | | | | | | |  | |
| Social mobilization | | 1,785,203 | | 7.16% | | | | | - | | | | | 0.0% | | | | | - | | | | | 0.0% | | | | | - | | | | 0.0% | | | | - | | | | | 0.0% | | | | | | | |  | |
| Service delivery | | - | | 0.0% | | | | | - | | | | | 0.0% | | | | | - | | | | | 0.0% | | | | | - | | | | 0.0% | | | | - | | | | | 0.0% | | | | | | | |  | |
| Other | | 10,031 | | 0.0% | | | | | 10,031 | | | | | 0.1% | | | | | 10,031 | | | | | 0.1% | | | | | 10,031 | | | | 0.1% | | | | 10,031 | | | | | 0.1% | | | | | | | |  | |
| Procurement* | | 19,998,525 | | 80.2% | | | | | 17,037,201 | | | | | 98.2% | | | | | 17,641,627 | | | | | 98.3% | | | | | 17,989,992 | | | | 98.3% | | | | 18,349,787 | | | | | 98.4% | | | | | | | |  | |
| Total with procurement costs | | 24,948,714 | | 100.0% | | | | | 17,344,847 | | | | | 100.0% | | | | | 17,949,314 | | | | | 100.0% | | | | | 18,297,707 | | | | 100.0% | | | | 18,657,541 | | | | | 100.0% | | | | | | | |  | |
| Total without procurement costs | | 4,950,189 | | 19.8% | | | | | 307,646 | | | | | 1.8% | | | | | 307,687 | | | | | 1.7% | | | | | 307,715 | | | | 1.7% | | | | 307,754 | | | | | 1.6% | | | | | | | |  | |
|  | |  | |  | | | | |  | | | | |  | | | | |  | | | | |  | | | | |  | | | |  | | | |  | | | | |  | | | | | | | |  | |
| Cost per dose administered with procurement costs | | 6.64 | | 100.0% | | | | | 5.42 | | | | | 100.0% | | | | | 5.42 | | | | | 100.0% | | | | | 5.42 | | | | 100.0% | | | | 5.41 | | | | | 100.0% | | | | | | | |  | |
| Cost per dose administered without procurement costs | | 1.32 | | 19.8% | | | | | 0.10 | | | | | 1.8% | | | | | 0.09 | | | | | 1.7% | | | | | 0.09 | | | | 1.7% | | | | 0.09 | | | | | 1.6% | | | | | | | |  | |
|  | |  | | | |  | | | | |  | | | | |  | | | | |  | | | | | |  | | | | |  | | | |  | | | | | | |  | | | | |  | |  | |
| **b.        Economic costs** | |  | | | |  | | | | |  | | | | |  | | | | |  | | | | | |  | | | | |  | | | |  | | | | | | |  | | | | |  | |  | |
| Training and microplanning | | 3,627,770 | | 8.4% | | | | | 372,556 | | | | | 1.1% | | | | | 383,216 | | | | | 1.1% | | | | | 390,225 | | | | 1.1% | | | | 400,372 | | | | | 1.1% | | | | | | | |  | |
| Cold chain expansion | | 420,945 | | 1.0% | | | | | 420,945 | | | | | 1.3% | | | | | 420,945 | | | | | 1.2% | | | | | 420,945 | | | | 1.2% | | | | 420,945 | | | | | 1.2% | | | | | | | |  | |
| Distribution | | 2,802,932 | | 6.5% | | | | | 3,003,250 | | | | | 9.1% | | | | | 3,221,627 | | | | | 9.4% | | | | | 3,365,186 | | | | 9.6% | | | | 3,573,057 | | | | | 9.9% | | | | | | | |  | |
| Supervision | | 1,792,628 | | 4.1% | | | | | 183,414 | | | | | 0.6% | | | | | 187,939 | | | | | 0.5% | | | | | 190,914 | | | | 0.5% | | | | 195,221 | | | | | 0.5% | | | | | | | |  | |
| Social mobilization | | 3,445,729 | | 7.9% | | | | | 357,317 | | | | | 1.1% | | | | | 371,209 | | | | | 1.1% | | | | | 380,342 | | | | 1.1% | | | | 393,566 | | | | | 1.1% | | | | | | | |  | |
| Service delivery | | 8,976,645 | | 20.7% | | | | | 9,150,986 | | | | | 27.8% | | | | | 9,341,045 | | | | | 27.3% | | | | | 9,465,988 | | | | 27.1% | | | | 9,646,903 | | | | | 26.9% | | | | | | | |  | |
| Other | | 2,278,246 | | 5.3% | | | | | 2,450,566 | | | | | 7.4% | | | | | 2,638,423 | | | | | 7.7% | | | | | 2,761,918 | | | | 7.9% | | | | 2,940,736 | | | | | 8.2% | | | | | | | |  | |
| Procurement* | | 19,998,525 | | 46.1% | | | | | 17,037,201 | | | | | 51.7% | | | | | 17,641,627 | | | | | 51.6% | | | | | 17,989,992 | | | | 51.5% | | | | 18,349,787 | | | | | 51.1% | | | | | | | |  | |
| Total with procurement costs | | 43,343,421 | | 100.0% | | | | | 32,976,235 | | | | | 100.0% | | | | | 34,206,032 | | | | | 100.0% | | | | | 34,965,510 | | | | 100.0% | | | | 35,920,587 | | | | | 100.0% | | | | | | | |  | |
| Total without procurement costs | | 23,344,895 | | 53.9% | | | | | 15,939,034 | | | | | 48.3% | | | | | 16,564,405 | | | | | 48.4% | | | | | 16,975,518 | | | | 48.5% | | | | 17,570,800 | | | | | 48.9% | | | | | | | |  | |
|  | |  | |  | | | | |  | | | | |  | | | | |  | | | | |  | | | | |  | | | |  | | | |  | | | | |  | | | | | | | |  | |
| Cost per dose administered with procurement costs | | 11.54 | | 100.0% | | | | | 10.31 | | | | | 100.0% | | | | | 10.32 | | | | | 100.0% | | | | | 10.35 | | | | 100.0% | | | | 10.42 | | | | | 100.0% | | | | | | | |  | |
| Cost per dose administered without procurement costs | | 6.22 | | 53.9% | | | | | 4.98 | | | | | 48.3% | | | | | 5.00 | | | | | 48.4% | | | | | 5.02 | | | | 48.5% | | | | 5.10 | | | | | 48.9% | | | | | | | |  | |
| *Refers to procurement of influenza vaccines, safety boxes and AD syringes | | | | |  | |  | | |  | |  | | |  | | |  | |  | | |  | |  | | |  | |  | | |  | |  | | | |  | |  | | | |  | |  | |  | |  | |

| *Supplementary table 4: Financial and economic costs of a campaign influenza vaccination strategy among children 6-23 months of age during the first five years of implementation in Kenya* | | | | | | | | | |  | |  | |
| --- | --- | --- | --- | --- | --- | --- | --- | --- | --- | --- | --- | --- | --- |
| **Cost category** | **2021** |  | **2022** |  | **2023** |  | **2024** |  | **2025** | |  | |
|  | **USD Amount** | **%** | **USD Amount** | **%** | **USD Amount** | **%** | **USD Amount** | **%** | **USD Amount** | | **%** | |
| **a.        Financial costs** |  |  |  |  |  |  |  |  |  | |  | |
| Training and microplanning | 1,926,195 | 9.0% | 550,324 | 3.0% | 582,834 | 3.0% | 604,205 | 3.0% | 635,151 | | 3.1% | |
| Cold chain expansion | 295,773 | 1.4% | 295,773 | 1.6% | 295,773 | 1.5% | 295,773 | 1.5% | 295,773 | | 1.4% | |
| Distribution | 13,184 | 0.1% | 13,422 | 0.1% | 13,682 | 0.1% | 13,852 | 0.1% | 14,099 | | 0.1% | |
| Supervision | 1,130,145 | 5.3% | 399,386 | 2.2% | 410,396 | 2.1% | 417,634 | 2.1% | 428,115 | | 2.1% | |
| Social mobilization | 3,095,579 | 14.4% | 802,593 | 4.4% | 862,306 | 4.4% | 901,561 | 4.5% | 958,401 | | 4.7% | |
| Service delivery | 1,538,372 | 7.2% | 1,538,372 | 8.4% | 1,538,372 | 7.8% | 1,538,372 | 7.7% | 1,538,372 | | 7.5% | |
| Other | 10,031 | 0.0% | 10,031 | 0.1% | 10,031 | 0.1% | 10,031 | 0.1% | 10,031 | | 0.0% | |
| Procurement* | 13,424,499 | 62.6% | 14,802,787 | 80.4% | 15,934,025 | 81.1% | 16,240,067 | 81.1% | 16,563,005 | | 81.0% | |
| Total with procurement costs | 21,433,779 | 100.0% | 18,412,688 | 100.0% | 19,647,419 | 100.0% | 20,021,496 | 100.0% | 20,442,947 | | 100.0% | |
| Total without procurement costs | 8,009,280 | 37.4% | 3,609,901 | 19.6% | 3,713,394 | 18.9% | 3,781,429 | 18.9% | 3,879,942 | | 19.0% | |
|  |  |  |  |  |  |  |  |  |  | |  | |
| Cost per dose administered with procurement costs | 8.50 | 100.0% | 6.62 | 100.0% | 6.57 | 100.0% | 6.56 | 100.0% | 6.57 | | 100.0% | |
| Cost per dose administered without procurement costs | 3.18 | 37.4% | 1.30 | 19.6% | 1.24 | 18.9% | 1.24 | 18.9% | 1.25 | | 19.0% | |
|  |  |  |  |  |  |  |  |  |  | |  | |
| **b.        Economic costs** |  |  |  |  |  |  |  |  |  | |  | |
| Training and microplanning | 3,859,335 | 12.6% | 1,033,623 | 4.1% | 1,066,149 | 4.0% | 1,087,530 | 4.1% | 1,118,491 | | 4.1% | |
| Cold chain expansion | 421,308 | 1.4% | 421,308 | 1.7% | 421,308 | 1.6% | 421,308 | 1.6% | 421,308 | | 1.5% | |
| Distribution | 775,775 | 2.5% | 792,518 | 3.2% | 810,771 | 3.1% | 822,771 | 3.1% | 840,146 | | 3.1% | |
| Supervision | 1,708,206 | 5.6% | 610,617 | 2.4% | 621,627 | 2.4% | 628,865 | 2.3% | 639,346 | | 2.3% | |
| Social mobilization | 4,267,737 | 14.0% | 1,217,726 | 4.9% | 1,277,439 | 4.8% | 1,316,694 | 4.9% | 1,373,534 | | 5.0% | |
| Service delivery | 5,341,070 | 17.5% | 5,369,425 | 21.4% | 5,400,337 | 20.5% | 5,420,658 | 20.2% | 5,450,082 | | 19.9% | |
| Other | 753,592 | 2.5% | 809,718 | 3.2% | 870,904 | 3.3% | 911,127 | 3.4% | 969,369 | | 3.5% | |
| Procurement* | 13,424,499 | 43.9% | 14,802,787 | 59.1% | 15,934,025 | 60.4% | 16,240,067 | 60.5% | 16,563,005 | | 60.5% | |
| Total with procurement costs | 30,551,522 | 100.0% | 25,057,722 | 100.0% | 26,402,559 | 100.0% | 26,849,019 | 100.0% | 27,375,279 | | 100.0% | |
| Total without procurement costs | 17,127,024 | 56.1% | 10,254,935 | 40.9% | 10,468,535 | 39.6% | 10,608,953 | 39.5% | 10,812,275 | | 39.5% | |
|  |  |  |  |  |  |  |  |  |  | |  | |
| Cost per dose administered with procurement costs | 12.12 | 100.0% | 9.01 | 100.0% | 8.82 | 100.0% | 8.80 | 100.0% | 8.80 | | 100.0% | |
| Cost per dose administered without procurement costs | 6.79 | 56.1% | 3.69 | 40.9% | 3.50 | 39.6% | 3.48 | 39.5% | 3.48 | | 39.5% | |
| *Refers to procurement of influenza vaccines, safety boxes and AD syringes | |  |  |  |  |  |  |  |  | |  | |
